# Supplementary material for: Skeletal Site-specific Changes in Bone Mass in a Genetic Mouse Model for Human 15q11-13 Duplication Seen in Autism
Source: PubMed Central journal article supplement (PMC5575059; doi:10.1038/s41598-017-09921-8), 2017-08-29
Supplement: 41598_2017_9921_MOESM1_ESM.pdf [file 41598_2017_9921_MOESM1_ESM.pdf]

**Supplementary information:**

**Skeletal Site-specific Changes in Bone Mass in a Genetic Mouse Model for Human 15q11-13 Duplication Seen in Autism**

Kirsty Lewis<sup>1S#</sup>, Kunal Sharan<sup>1,X#</sup>, Toru Takumi<sup>2,3</sup> and Vijay K. Yadav<sup>1,4\*</sup>

<sup>1</sup>Department of Mouse and Zebrafish Genetics, Wellcome Trust Sanger Institute, Cambridge CB10 1SA, United Kingdom

<sup>2</sup>RIKEN Brain Science Institute (BSI), Wako, Saitama, Japan

<sup>3</sup>Graduate School of Biomedical Sciences, Hiroshima University, Minami, Hiroshima, Japan

<sup>4</sup>Metabolic Research Laboratory, National Institute of Immunology, Aruna Asaf Ali Marg, New Delhi, India 110067

<sup>S</sup>Present Address: Department of Physiology, Pharmacology, Neuroscience, University of Bristol, Bristol, BS8 1TD, United Kingdom

<sup>X</sup>Present Address: Department of Molecular Nutrition, CSIR-Central Food Technological Research Institute, Mysore, India

<sup>#</sup>These authors contributed equally to this work and have been listed alphabetically

\* Corresponding Author:

email: vijay@nii.ac.in

## Supplementary Table 1

### qPCR Primer sequences utilized in the study

| Gene                                                                                                                                    | Symbol        |   | Sequence (5' -> 3')     | Amplicon Size |
|-----------------------------------------------------------------------------------------------------------------------------------------|---------------|---|-------------------------|---------------|
| Mus musculus cholinergic receptor, nicotinic, alpha polypeptide 7 ( <i>Chrna7</i> ), mRNA.                                              | <i>Chrna7</i> | F | CACATTCCACACCAACGTCTT   | 106           |
|                                                                                                                                         |               | R | AAAAGGGAACCCAGCGTACATC  |               |
| Mus musculus makorin, ring finger protein, 3 ( <i>Mkrn3</i> ), mRNA.                                                                    | <i>Mkrn3</i>  | F | ACAGGTGTGCATACCCCA      | 101           |
|                                                                                                                                         |               | R | GCAGGCCCTTCTATGAGCTTC   |               |
| Mus musculus melanoma antigen, family L, 2 ( <i>Magel2</i> ), mRNA                                                                      | <i>Magel2</i> | F | AGAGCGCATGTTTCATTGGTG   | 248           |
|                                                                                                                                         |               | R | CCTCTACGCAGGCATAAGGAT   |               |
| Mus musculus necdin ( <i>Ndn</i> ), mRNA                                                                                                | <i>Ndn</i>    | F | GAGGTCCCGACTGTGAGAT     | 179           |
|                                                                                                                                         |               | R | TGCAGGATTTAGGGTCAACATC  |               |
| Mus musculus small nuclear ribonucleoprotein N ( <i>Snrpn</i> ), transcript variant 3, mRNA.                                            | <i>Snrpn</i>  | F | TGCTACGTGGGGAGAACCTG    | 156           |
|                                                                                                                                         |               | R | CCTGGGGAATAGGTACACCTG   |               |
| Mus musculus ubiquitin protein ligase E3A ( <i>Ube3a</i> ), transcript variant 2, mRNA.                                                 | <i>Ube3a</i>  | F | ATCCCACTCTGAGGACATTGA   | 126           |
|                                                                                                                                         |               | R | GCACAAAACCTATTCTGCAG    |               |
| Mus musculus ATPase, class V, type 10A ( <i>Atp10a</i> ), mRNA.                                                                         | <i>Atp10a</i> | F | CCGCTAGCCAATGTGTACTT    | 113           |
|                                                                                                                                         |               | R | TGACCCGCGAATGAAGAGC     |               |
| Mus musculus gamma-aminobutyric acid (GABA) A receptor, subunit alpha 5 ( <i>Gabra5</i> ), mRNA                                         | <i>Gabra5</i> | F | TGACCCAAACCCTCTTGCT     | 109           |
|                                                                                                                                         |               | R | GTGATGTTGTCATTGGTCTCGT  |               |
| Mus musculus gamma-aminobutyric acid (GABA) A receptor, subunit gamma 3 ( <i>Gabrg3</i> ), mRNA                                         | <i>Gabrg3</i> | F | GACAGTCGCCTTCGATTCAAC   | 114           |
|                                                                                                                                         |               | R | AGCCTCCGCTGTTTTAGAATTT  |               |
| Mus musculus gamma-aminobutyric acid (GABA) A receptor, subunit beta 3 ( <i>Gabrb3</i> ), transcript variant 2, mRNA                    | <i>Gabrb3</i> | F | CTGCTGCCAATCTGGCTTTC    | 121           |
|                                                                                                                                         |               | R | CGTAGCCTTTCAACAGCTTGTC  |               |
| Mus musculus hect (homologous to the E6-AP (UBE3A) carboxyl terminus) domain and RCC1 (CHC1)-like domain (RLD) 2 ( <i>Herc2</i> ), mRNA | <i>Herc2</i>  | F | CACCTGTGTATAGAGCCAAGTCA | 157           |
|                                                                                                                                         |               | R | TTCAACCTCAAGGCTGAGAGT   |               |

| Genotyping Primer Sequences | Symbol      |   | Sequence (5' -> 3')       | Amplicon Size |
|-----------------------------|-------------|---|---------------------------|---------------|
|                             | <i>Dup7</i> | F | ATATGTACTTTTGCATATAGTATAC | 450           |
|                             |             | R | AGAGGAGGGCCTTACTAATTACTTA |               |
